# Supplementary material for: Impact of COVID-19-Related Social Isolation on Behavioral Outcomes in Young Adults Residing in Northern Italy
Source: MDPI journal article supplement (doi:10.3390/ijerph192416496), 2022-12-08
Supplement: s1 [file s1]

## Supplementary Materials

**Table S1. Complete ASR scores at the baseline and follow-up visit.** ASR scores (median, 1<sup>st</sup> and 3<sup>rd</sup> quartile) obtained baseline and follow-up and the differences estimated between the two time-points for 65 PHIME participants. P-values are estimated through the sign test.

| ASR score              | Baseline          | Follow-up         | ASR pre-post     | p     |
|------------------------|-------------------|-------------------|------------------|-------|
| Anxious Depressed      | 58.0 (53.0, 65.0) | 58.0 (52.0, 63.2) | 0.0 (-3.2, 3.0)  | 1.000 |
| Withdrawn              | 55.0 (51.0, 65.0) | 55.0 (50.0, 63.0) | -1.0 (-4.0, 3.0) | 0.108 |
| Somatic Complaints     | 56.0 (51.0, 62.0) | 54.0 (51.0, 58.0) | 0.0 (-4.0, 2.0)  | 0.480 |
| Thought Problems       | 51.5 (50.0, 55.8) | 53.5 (51.0, 58.2) | 1.0 (-1.0, 4.0)  | 0.049 |
| Attention Problems     | 54.0 (51.0, 58.0) | 55.0 (51.0, 58.2) | 0.0 (-2.0, 3.0)  | 1.000 |
| Rule Breaking Behavior | 51.0 (50.0, 53.0) | 51.0 (50.0, 52.0) | 0.0 (-1.0, 0.0)  | 0.188 |
| Aggressive Behavior    | 52.5 (50.0, 57.0) | 53.0 (51.0, 58.0) | 0.0 (-2.0, 3.0)  | 0.784 |
| Internalizing Problems | 59.0 (52.0, 66.0) | 58.0 (51.0, 64.0) | -2.0 (-6.2, 4.0) | 0.124 |
| Externalizing Problems | 51.5 (42.8, 55.0) | 50.0 (43.8, 54.2) | 0.0 (-5.0, 4.0)  | 1.000 |
| Total Problems         | 52.5 (48.0, 60.0) | 53.0 (46.8, 58.0) | 0.0 (-4.2, 3.0)  | 0.590 |

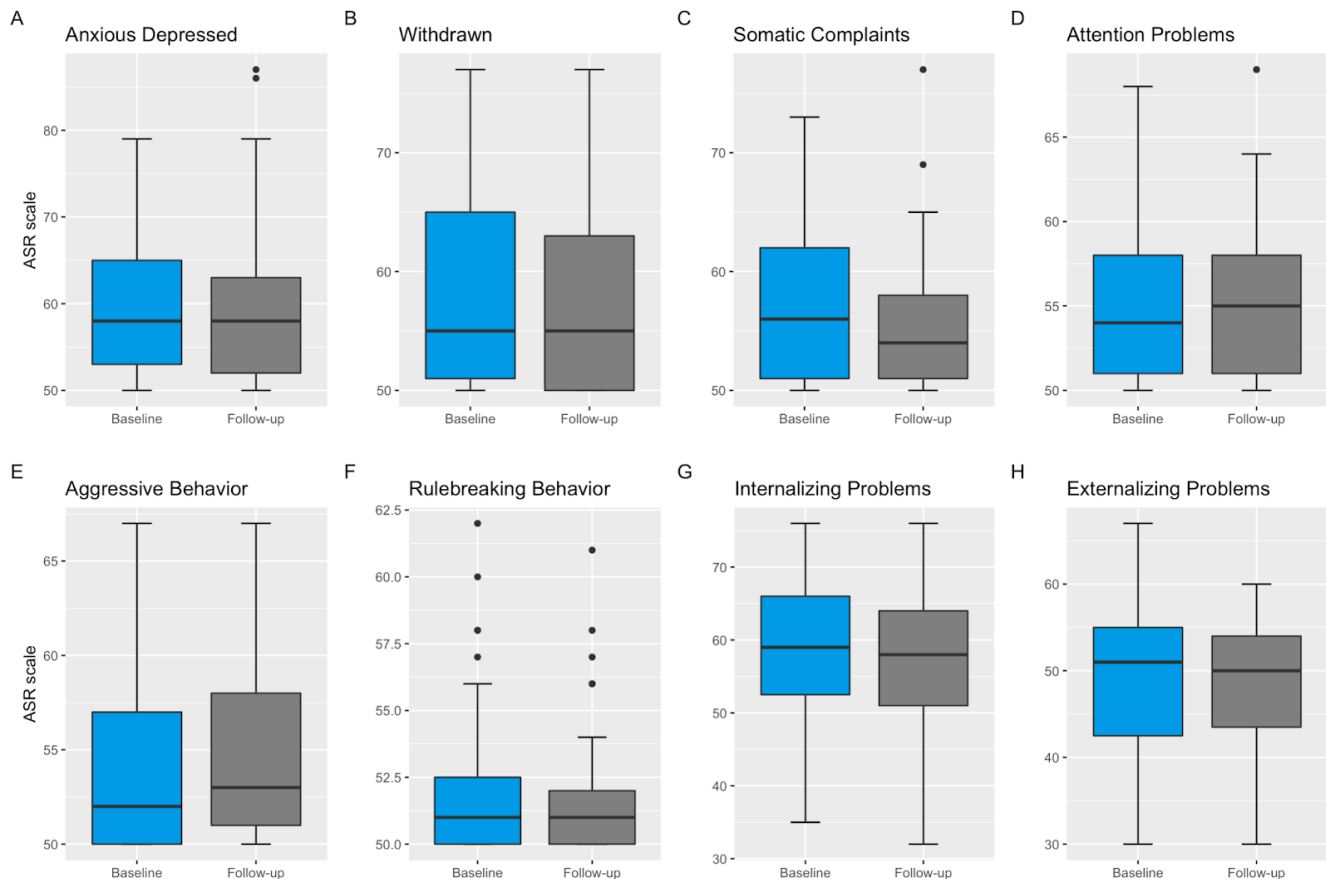

**Figure S1. Differences in all ASR score between baseline and follow up.** The boxplot shows the scores obtained in six clinical scales measured by the ASR and in “Internalizing” and “Externalizing” problems scale of the questionnaire in the two time points considered: baseline visit (blue box) and follow up visit (gray box).

**Table S2. Interaction between socio-demographic variables and ASR scales.** Relationship between the sociodemographic variables (sex age, SES and IQ) of the sample and the psychopathological outcomes at the follow-up visit.

| Predictors            | Anxious Depressed     |              |             | Withdrawn           |              |              | Somatic Complaints     |              |       | Thought Problems       |              |       | Attention Problems |              |              |
|-----------------------|-----------------------|--------------|-------------|---------------------|--------------|--------------|------------------------|--------------|-------|------------------------|--------------|-------|--------------------|--------------|--------------|
|                       | Estimates             | CI           | p           | Estimates           | CI           | p            | Estimates              | CI           | p     | Estimates              | CI           | p     | Estimates          | CI           | p            |
| High vs Low SI        | 0.62                  | -2.91 – 4.16 | 0.725       | -0.32               | -4.43 – 3.79 | 0.877        | -1.27                  | -4.51 – 1.98 | 0.438 | 0.1                    | -2.66 – 2.86 | 0.943 | -0.22              | -2.85 – 2.40 | 0.866        |
| Sex: Females vs Males | 0.83                  | -2.34 – 4.00 | 0.602       | -1.04               | -4.58 – 2.51 | 0.559        | 2.8                    | -0.11 – 5.72 | 0.059 | -0.23                  | -2.71 – 2.24 | 0.852 | 1.38               | -0.98 – 3.73 | 0.247        |
| SES: Medium vs Low    | 1.92                  | -2.06 – 5.90 | 0.338       | -0.1                | -4.73 – 4.52 | 0.964        | -0.71                  | -4.36 – 2.94 | 0.700 | -0.47                  | -3.58 – 2.63 | 0.761 | -0.75              | -3.70 – 2.20 | 0.613        |
| SES: High vs Low      | 1.21                  | -3.38 – 5.80 | 0.600       | -4.21               | -9.55 – 1.14 | 0.120        | -1.29                  | -5.50 – 2.92 | 0.542 | -2.18                  | -5.76 – 1.40 | 0.228 | 0                  | -3.41 – 3.41 | 0.999        |
| Age                   | -0.08                 | -0.75 – 0.59 | 0.812       | 0.11                | -0.82 – 1.05 | 0.809        | 0.59                   | -0.02 – 1.21 | 0.060 | 0.29                   | -0.23 – 0.82 | 0.270 | 0.31               | -0.19 – 0.81 | 0.214        |
| IQ                    | 0.17                  | 0.01 – 0.34  | <b>0.04</b> | 0.22                | 0.05 – 0.39  | <b>0.012</b> | 0.06                   | -0.09 – 0.21 | 0.460 | 0.05                   | -0.07 – 0.18 | 0.413 | 0.13               | 0.00 – 0.25  | <b>0.043</b> |
| Predictors            | Rulebreaking Behavior |              |             | Aggressive Behavior |              |              | Internalizing Problems |              |       | Externalizing Problems |              |       | Total Problems     |              |              |
|                       | Estimates             | CI           | p           | Estimates           | CI           | p            | Estimates              | CI           | p     | Estimates              | CI           | p     | Estimates          | CI           | p            |
| High vs Low SI        | 1.73                  | -0.03 – 3.48 | 0.053       | 1.21                | -1.54 – 3.95 | 0.381        | -0.77                  | -4.73 – 3.19 | 0.700 | 2.2                    | -2.07 – 6.47 | 0.306 | 0.6                | -2.67 – 3.87 | 0.714        |
| Sex: Females vs Males | 0.48                  | -1.09 – 2.05 | 0.542       | 0.06                | -2.40 – 2.53 | 0.959        | 0.82                   | -2.74 – 4.37 | 0.647 | 0.25                   | -3.58 – 4.07 | 0.898 | 0.49               | -2.44 – 3.42 | 0.740        |
| SES: Medium vs Low    | -1.14                 | -3.11 – 0.83 | 0.249       | -0.11               | -3.20 – 2.98 | 0.943        | 2.2                    | -2.25 – 6.65 | 0.327 | 2.7                    | -2.10 – 7.49 | 0.265 | 1                  | -2.67 – 4.67 | 0.588        |
| SES: High vs Low      | -1.36                 | -3.63 – 0.92 | 0.237       | 0.32                | -3.25 – 3.88 | 0.860        | -0.88                  | -6.01 – 4.26 | 0.733 | 2.6                    | -2.94 – 8.14 | 0.351 | -0.9               | -5.14 – 3.34 | 0.672        |
| Age                   | 0.35                  | 0.02 – 0.68  | <b>0.04</b> | -0.13               | -0.66 – 0.39 | 0.611        | -0.07                  | -0.82 – 0.69 | 0.859 | -0.19                  | -1.01 – 0.62 | 0.634 | 0.2                | -0.42 – 0.83 | 0.514        |
| IQ                    | 0.04                  | -0.04 – 0.12 | 0.342       | 0.12                | -0.00 – 0.25 | 0.055        | 0.18                   | -0.01 – 0.36 | 0.060 | 0.13                   | -0.07 – 0.33 | 0.189 | 0.15               | 0.00 – 0.30  | <b>0.048</b> |

**Table S3. Association between time in social isolation and the ASR scales by sex.** Relationship between the time spent in social isolation and the psychopathological outcomes at the follow-up visit by sex. Models were adjusted by age, SES and IQ.

| Predictors                                  | Anxious Depressed diff |              |     | Withdrawn diff |              |       | Somatic Complaints diff |               |              | Thought Problems diff |             |       | Attention Problems diff |             |     |
|---------------------------------------------|------------------------|--------------|-----|----------------|--------------|-------|-------------------------|---------------|--------------|-----------------------|-------------|-------|-------------------------|-------------|-----|
|                                             | Estimates              | CI           | p   | Estimates      | CI           | p     | Estimates               | CI            | p            | Estimates             | CI          | p     | Estimates               | CI          | p   |
| Females with High SI vs Females with Low SI | 1.69                   | -            | 0.4 | -2.11          | -            | 0.37  | -2.25                   | -             | 0.28         | 0.01                  | -           | 0.996 | -1.56                   | -           | 0.3 |
|                                             |                        | 2.90 – 6.28  | 63  |                | 6.87 – 2.66  | 7     |                         | 6.46 – 1.96   | 9            |                       | 3.55 – 3.57 | 0.996 |                         | 4.94 – 1.81 | 58  |
| Males with Low SI vs Females with Low SI    | -0.08                  | -            | 0.9 | -0.26          | -            | 0.89  | -3.50                   | -6.98 – -0.02 | <b>0.049</b> | 0.14                  | -           | 0.922 | -2.32                   | -           | 0.1 |
|                                             |                        | 3.87 – 3.72  | 68  |                | 4.21 – 3.68  | 4     |                         |               |              |                       | 2.80 – 3.09 | 0.922 |                         | 5.11 – 0.47 | 01  |
| Males with High SI vs Females with Low SI   | -2.73                  | -            | 0.4 | 6.38           | -            | 0.154 | 2.52                    | -             | 0.461        | -0.40                 | -           | 0.89  | 3.43                    | -           | 0.2 |
|                                             |                        | 10.16 – 4.69 | 64  |                | 2.50 – 15.26 | 6     |                         | 4.29 – 9.33   | 0.461        |                       | 6.21 – 5.42 | 0.89  |                         | 2.04 – 8.89 | 14  |
| SES: Medium vs Low                          | 1.58                   | -            | 0.4 | 0.29           | -            | 0.90  | -0.40                   | -             | 0.83         | -0.17                 | -           | 0.916 | -0.33                   | -           | 0.8 |
|                                             |                        | 2.52 – 5.68  | 43  |                | 4.31 – 4.89  | 0     |                         | 4.16 – 3.37   | 4            |                       | 3.34 – 3.00 | 0.916 |                         | 3.34 – 2.69 | 29  |
| SES: High vs Low                            | 0.76                   | -            | 0.7 | -3.65          | -            | 0.17  | -0.87                   | -             | 0.69         | -2.05                 | -           | 0.276 | 0.57                    | -           | 0.7 |
|                                             |                        | 4.02 – 5.53  | 52  |                | 8.99 – 1.68  | 4     |                         | 5.25 – 3.51   | 2            |                       | 5.79 – 1.69 | 0.276 |                         | 2.94 – 4.08 | 46  |

|                                             |                              |                      |                         |                            |                     |                         |                               |                      |           |                               |                       |           |                       |                       |           |
|---------------------------------------------|------------------------------|----------------------|-------------------------|----------------------------|---------------------|-------------------------|-------------------------------|----------------------|-----------|-------------------------------|-----------------------|-----------|-----------------------|-----------------------|-----------|
| Age                                         | -0.04                        | -<br>0.73 – 0.<br>64 | 0.8<br>96               | -0.03                      | -<br>0.98 –<br>0.91 | 0.94<br>1               | 0.56                          | -<br>0.07 – 1.1<br>9 | 0.07<br>9 | 0.23                          | -<br>0.30 – 0.7<br>6  | 0.386     | 0.27                  | -<br>0.23 – 0.<br>77  | 0.2<br>87 |
| IQ                                          | 0.18                         | 0.01 – 0.<br>34      | <b>0.0</b><br><b>37</b> | 0.20                       | 0.03 –<br>0.37      | <b>0.01</b><br><b>9</b> | 0.05                          | -<br>0.10 – 0.2<br>0 | 0.49<br>2 | 0.05                          | -<br>0.08 – 0.1<br>8  | 0.471     | 0.12                  | -<br>0.00 – 0.<br>24  | 0.0<br>50 |
| <hr/>                                       |                              |                      |                         |                            |                     |                         |                               |                      |           |                               |                       |           |                       |                       |           |
|                                             | <b>Rulebreaking Behavior</b> |                      |                         | <b>Aggressive Behavior</b> |                     |                         | <b>Internalizing Problems</b> |                      |           | <b>Externalizing Problems</b> |                       |           | <b>Total Problems</b> |                       |           |
| Females with High SI vs Females with Low SI | 0.12                         | -<br>2.06 – 2.<br>30 | 0.9<br>10               | 0.80                       | -<br>2.78 –<br>4.37 | 0.65<br>6               | -1.06                         | -<br>6.22 – 4.1<br>0 | 0.68<br>2 | 0.86                          | -<br>4.68 – 6.3<br>9  | 0.757     | -0.98                 | -<br>5.19 – 3.<br>22  | 0.6<br>42 |
| Males with Low SI vs Females with Low SI    | -1.61                        | -<br>3.41 – 0.<br>19 | 0.0<br>78               | -0.35                      | -<br>3.31 –<br>2.60 | 0.81<br>2               | -1.02                         | -<br>5.29 – 3.2<br>4 | 0.63<br>2 | -1.19                         | -<br>5.77 – 3.3<br>8  | 0.603     | -1.61                 | -<br>5.08 – 1.<br>87  | 0.3<br>58 |
| Males with High SI vs Females with Low SI   | 4.10                         | 0.57 – 7.<br>62      | <b>0.0</b><br><b>24</b> | 1.05                       | -<br>4.73 –<br>6.83 | 0.71<br>7               | 0.75                          | -<br>7.60 – 9.1<br>0 | 0.85<br>8 | 3.43                          | -<br>5.52 – 12.<br>38 | 0.44<br>6 | 4.05                  | -<br>2.76 – 10<br>.85 | 0.238     |
| SES: Medium vs Low                          | -0.64                        | -<br>2.59 – 1.<br>31 | 0.5<br>13               | 0.02                       | -<br>3.17 –<br>3.21 | 0.99<br>0               | 2.29                          | -<br>2.32 – 6.9<br>0 | 0.32<br>3 | 3.12                          | -<br>1.82 – 8.0<br>6  | 0.211     | 1.50                  | -<br>2.26 – 5.<br>25  | 0.4<br>27 |
| SES: High vs Low                            | -0.68                        | -<br>2.94 – 1.<br>59 | 0.5<br>53               | 0.49                       | -<br>3.23 –<br>4.21 | 0.79<br>3               | -0.75                         | -<br>6.12 – 4.6<br>1 | 0.77<br>9 | 3.17                          | -<br>2.58 – 8.9<br>3  | 0.274     | -0.23                 | -<br>4.60 – 4.<br>14  | 0.9<br>17 |
| Age                                         | 0.30                         | -<br>0.03 – 0.<br>62 | 0.0<br>72               | -0.15                      | -<br>0.68 –<br>0.39 | 0.58<br>2               | -0.08                         | -<br>0.85 – 0.6<br>9 | 0.84<br>2 | -0.24                         | -<br>1.06 – 0.5<br>8  | 0.563     | 0.15                  | -<br>0.47 – 0.<br>78  | 0.6<br>30 |
| IQ                                          | 0.03                         | -<br>0.05 – 0.<br>11 | 0.4<br>01               | 0.12                       | -<br>0.01 –<br>0.25 | 0.06<br>0               | 0.17                          | -<br>0.01 – 0.3<br>6 | 0.06<br>4 | 0.13                          | -<br>0.07 – 0.3<br>2  | 0.208     | 0.15                  | -<br>0.00 – 0.<br>30  | 0.0<br>57 |
